# Supplementary material for: Trajectory encounter number as a diagnostic of mixing potential in fluid flows
Source: Copernicus journal article supplement (doi:10.5194/npg-2016-72), 2016-12-07
Supplement: Supplementary file [file npg-2016-72-AC2-supplement.pdf]

# Trajectory encounter volume as a diagnostic of mixing potential in fluid flows

Irina I. Rypina<sup>1</sup> and Larry J. Pratt<sup>1</sup>

<sup>1</sup> Woods Hole Oceanographic Institution, Physical Oceanography department,  
266 Woods Hole rd., Woods Hole MA, 02543

Corresponding author email: irypina@whoi.edu

## Abstract

Fluid parcels can exchange water properties when coming in contact with each other, leading to mixing. The trajectory encounter mass and a related simplified quantity, encounter volume, are introduced as a measure of the mixing potential of a flow. Encounter volume quantifies the volume of fluid that passes close to a reference trajectory over a finite time interval. Regions characterized by low encounter volume, such as cores of coherent eddies, have low mixing potential, whereas turbulent or chaotic regions characterized by large encounter volume have high mixing potential. The encounter volume diagnostic is used to characterize mixing potential in 3 flows of increasing complexity: the Duffing Oscillator, the Bickley Jet, and the altimetry-based velocity in the Gulf Stream Extension region. An additional example is presented in which the encounter volume is combined with the  $u^*$ -approach of Pratt et al., 2016 to characterize the mixing potential for a specific tracer distribution in the Bickley Jet flow. Analytical relationships are derived connecting encounter volume to shear and strain rates for linear shear and linear strain flows, respectively. It is shown that in both flows the encounter volume is proportional to time.

## I. Encounter volume

### a. main idea

Mixing is an irreversible exchange of properties between different water masses. This process is important for maintaining the oceanic large-scale stratification and general circulation, and it plays a key role in the redistribution of bio-geo-chemical tracers throughout the world oceans. Mixing occurs between different water masses when they come in direct contact with each other. Thus, mixing potential of the flow, i.e., the opportunity for mixing to occur, is generally enhanced in regions where water parcels meet or encounter many other water parcels and thus are exposed to a large amount of fluid passing by them as the flow evolves. This would be the case, for example, for a parcel within a chaotic zone—a region of the flow that is in a state of chaotic advection. There, the separation between initially nearby water parcels grows exponentially in time and, in the infinite time limit, each water parcel encounters all the other water parcels within the same zone and gets in contact with the entire volume of the chaotic zone. Similarly, high encounter volumes will exist in turbulent regions. In contrast, mixing potential and encounter volume is expected to be smaller in regions where water parcels do not experience many encounters with other water parcels and remain close to their initial neighbors

37 as the flow evolves. This would be the case, for example, for a water parcel that is located inside  
38 a coherent eddy. If the eddy is in a state of solid body rotation, the water parcel would forever  
39 stay close to its initial neighbors and will not have any new encounters at all. If some amount of  
40 azimuthal shear is present within the eddy, then for a water parcel located at a radius  $r$  from the  
41 eddy center, encounters will be limited to those water parcels located within a circular strip  
42 centered at the same  $r$ .

43 Of course, the presence of a mixing potential does not guarantee that the mixing of a tracer will  
44 occur: it is also essential that the tracer distribution is non-uniform, so that irreversible property  
45 exchange can take place between different water parcels during their encounters. This exchange  
46 happens by diffusion and therefore relies on a concentration difference between two parcels.  
47 Thus, the intensity of mixing would depend on both the tracer distribution and the flow, whereas  
48 mixing potential is the property of only the flow field alone. In this work we introduce the  
49 concept of an *encounter mass*,  $M$ , and *encounter volume*,  $V$ , which serves as a simplified  
50 representation of  $M$  in incompressible flows, as an objective measures of encounters between  
51 different fluid elements in order to quantify the mixing potential of a fluid flow. There are many  
52 existing trajectory-based measures of fluid stirring; ours has the virtue of having a  
53 straightforward physical interpretation and being easy to implement and immediately applicable  
54 to ocean float and drifter data. Our method does not require sophisticated book keeping as in  
55 braided theory (Allshouse and Thiffeault, 2012) or finite-time entropy (Froyland and Padberg-  
56 Gehle, 2012).

#### 57 b. definition and numerical implementation

58 For a given reference trajectory,  $\vec{x}(\vec{x}_0, t_0; T)$ , the *encounter mass*,  $M(\vec{x}_0, t_0; T)$ , is defined as the  
59 total mass of fluid that passes within a radius  $R$  of reference trajectory over a finite time interval  
60  $t_0 < t < t_0 + T$ . One might imagine a sphere that has radius  $R$  and that is centered at and moves  
61 with the reference trajectory. The encounter mass then consists of the mass of the fluid that is  
62 initially located within the sphere along with the mass of all the fluid that passes through the  
63 sphere over the time interval  $t_0 < t < t_0 + T$ . Note that it is generally not possible to compute  
64 the latter by simply integrating the mass flux into the sphere over  $t_0 < t < t_0 + T$  since some  
65 fluid may leave and then re-enter the sphere and would be counted more than once, so  
66 Lagrangian information is required to keep track of the history of each fluid parcel trajectory  
67 entering the sphere.

68  
69 To this end, subdivide the entire fluid at  $t = t_0$  into small compact fluid elements with masses  
70  $\delta M_i = \rho_i \delta V_i$ , where  $\rho_i$  is the density of a fluid element and  $\delta V_i$  is its volume. We wish to follow  
71 the motion of each fluid element over time interval  $t_0 < t < t_0 + T$ , and we assume that the  
72 elements remain compact over such time, so that the motion of each fluid element can be well-  
73 represented by one trajectory. If the fluid elements stretch and deform too much, we can evoke  
74 the continuum hypothesis and make  $\delta M$  sufficiently small that such compactness is assured. In

75 the limit of infinitesimal fluid elements,  $\delta M_i \rightarrow dM$ , we can associate with each infinitesimal fluid  
 76 element a unique trajectory. The encounter mass is then

$$77 \quad M = \lim_{dM_i \rightarrow 0} \sum_i dM_i.$$

78 For an incompressible flow, the density and volume of each fluid element,  $\rho_i$  and  $\delta V_i$ , remain  
 79 constant following a trajectory, although different fluid elements are still allowed to have  
 80 different densities such as, for example, in stratified 3D geophysical flows. If the flow is  
 81 unstratified, the densities of all fluid elements are equal,  $\rho_i = \rho$ , and the encounter mass  
 82 becomes

$$83 \quad M = \rho V,$$

84 where

$$V(\vec{x}_0, t_0; T) = \lim_{dV_i \rightarrow 0} \sum_i dV_i$$

85 is the *encounter volume* – the total volume of fluid that passes within a radius  $R$  of reference  
 86 trajectory over a finite time interval  $t_0 < t < t_0 + T$ . When all volume elements are equal,  
 87  $dV_i = dV$ , the encounter volume can be further simplified to

$$88 \quad V = \lim_{dV \rightarrow 0} N dV,$$

89 where the *encounter number*,  $N(\vec{x}_0, t_0; T)$ , is the number of trajectories that come within a radius  
 90  $R$  of the reference trajectory over a time interval  $t_0 < t < t_0 + T$ . We will refer to  $t_0$  as the  
 91 starting time,  $T$  as the trajectory integration time, and  $\vec{x}_0$  as the trajectory initial position, i.e.,  
 92  $\vec{x}(\vec{x}_0, t_0; T = 0) = \vec{x}_0$ . For practical applications with geophysical flows, the limit in the  
 93 definition of the encounter volume can be dropped and one can simply use the approximation

$$V \approx N \delta V$$

94 with the dense grid of initial positions  $\vec{x}_0$ . Mathematically, the encounter number can be written  
 95 as  $N = \sum_{k=1}^K \mathbb{I}(\min(|\vec{x}_k(\vec{x}_0, t_0; T) - \vec{x}(\vec{x}_0, t_0; T)|) \leq R)$  where the indicator function  $\mathbb{I}$  is 1 if true  
 96 and 0 if false, and  $K$  is the total number of Lagrangian particles released. The encounter volume  
 97 depends on the starting time, integration time, encounter radius, and the number of trajectories  
 98 (i.e., grid spacing); all of these parameter dependences will be discussed below. Once the  
 99 encounter volume is estimated, regions of space with large/small  $V$  would then be associated  
 100 with enhanced/inhibited mixing potential. For the remainder of this paper, we will focus on  
 101 incompressible fluid flows and will be concerned with the encounter volume, rather than  
 102 encounter mass.

103

104 We define  $V(\vec{x}_0, t_0; T)$  and  $N(\vec{x}_0, t_0; T)$  based on the number of encounters with different  
105 trajectories, not the total number of encounter events, so even if some trajectory first comes close  
106 to the reference trajectory, then moves away and then re-approaches it again later, it is only  
107 counted once. In a flow field with no sources or sinks of tracer variance, where variance is  
108 therefore decaying, it is reasonable to expect that most property exchange between two parcels  
109 will often occur during their first encounter, thus the motive for counting only the first encounter.  
110 Note that this assumption may not hold if the parcels re-acquire different properties after their  
111 first encounter due to encountering and exchanging properties with other parcels. In this case, or  
112 in the case when tracer variance is being continuously introduced, it may be more reasonable to  
113 count the total number of encounters.

114 For a numerical implementation of the trajectory encounter volume-based mixing  
115 characterization, one would need to start, at some time  $t_0$ , with a grid of initial positions  
116 spanning the flow domain, and then evolve trajectories under the flow field over the time interval  
117  $T$ . This time interval should be chosen based on the physical properties of the flow and with  
118 specific scientific questions in mind. For example, if the research focus is on ocean submesoscale  
119 dynamics, the time scale  $T$  would be on the order of hours to days, whereas the corresponding  
120 time scale for mesoscale dynamics would be on the order of weeks to months.

121  $V(\vec{x}_0, t_0; T)$  is a Lagrangian quantity that characterizes mixing potential of a flow over a time  
122 interval from  $t_0$  to  $t_0 + T$ . As the flow field evolves in time, its mixing characteristics can  
123 change and  $V(\vec{x}_0, t_0; T)$  will reflect this change. For example, if a coherent eddy with weak  
124 mixing potential, embedded in a chaotic zone with enhanced mixing potential, was present in the  
125 flow from time  $t_1$  to time  $t_2$ , but it dispersed and disappeared afterwards, then  $V(\vec{x}_0, t_0; T)$  is  
126 expected to be small at those locations  $\vec{x}_0$  that correspond to the interior of an eddy for  $t_0 \geq t_1$   
127 and  $t_0 + T \leq t_2$ , whereas for  $t_0 > t_2$ , when the eddy is no longer present,  $V(\vec{x}_0, t_0; T)$  would  
128 increase. Dependences on  $T$  and  $t_0$  are similarly expected to be present within a chaotic zone.

129 In the infinite time limit,  $T \rightarrow \infty$ , when all parcels within a chaotic zone (or turbulent region) of  
130 finite extent encounter all other parcels within the same chaotic zone, the encounter volume  
131  $V(\vec{x}_0, t_0; T \rightarrow \infty)$  approaches a constant equal to the volume (or area in 2d) of the chaotic zone.  
132 For 2D, incompressible flow, the encounter rates over finite  $T$  are locally the largest near a  
133 hyperbolic trajectory and along the segments of its associated stable manifolds. The stable  
134 manifolds serve as pathways that bring water parcels from remote regions into the vicinity of the  
135 hyperbolic trajectory, where parcels stay for extended periods of time, and where many  
136 encounters occur. Note that the unstable manifolds, on the other hand, will rapidly remove a  
137 particle from a hyperbolic region, thus limiting its exposure to the high-encounter region near the  
138 hyperbolic trajectory. For this reason, the unstable manifolds are not revealed by encounter  
139 volume calculation performed in forward time and require a backward-time calculation instead.  
140 This exclusive link between forward/backward in time calculation of trajectories and  
141 stable/unstable manifolds, respectively, is not specific to the encounter volume diagnostic, but

142 rather is typical for many finite-time methods from the dynamical systems theory, including  
143 finite-time Lyapunov exponents (FTLEs), which in forward time approximate segments of stable  
144 manifold as maximizing ridges (Haller, 2002; Shadden et al., 2005; Lekien and Ross, 2010).

145 Since locations of hyperbolic trajectories and manifolds generally evolve in time,  $V(\vec{x}_0, t_0; T)$  is  
146 expected to also vary with  $t_0$ . As the trajectory integration time  $T$  increases, water parcels  
147 initially located further from the hyperbolic trajectory will have the opportunity to come into its  
148 vicinity along the stable manifold. Such parcels, as they approach the hyperbolic trajectory, are  
149 expected to have more encounters than their neighbors that are initially located off the manifold  
150 and thus bypass the vicinity of the hyperbolic trajectory where many encounters occur. Thus,  
151  $V(\vec{x}_0, t_0; T)$  reveals longer segments of stable manifolds for longer integration time  $T$ , as will be  
152 illustrated numerically in the next section. In the long integration time limit, when each  
153 manifold, either stable or unstable, densely fills the entire chaotic zone forming a dense  
154 homoclinic or heteroclinic tangle, the whole tangle will be characterized by high encounter  
155 volumes in both forward and backward time. Again, this is similar to how the maximizing ridges  
156 of the forward time FTLEs elongate and sharpen with increasing integration time.

157  
158 The radius  $R$ , which defines how close to a reference trajectory should another trajectory come in  
159 order to be counted as an encounter, is an important parameter for the calculation of the  
160 encounter volume  $V$ . Generally,  $R$  should be small compared to the spatial scale of the smallest  
161 features of interest. Specifically, for the  $V$  field to delineate a flow feature, say, an eddy,  
162 trajectories within the eddy interior should not encounter those on its exterior. The boundary  
163 region near the eddy perimeter, where such encounters can occur, has the width  $2R$ . So, if that  
164 width is comparable to or larger than the eddy size, then the eddy would get completely smeared  
165 out and will not be resolved. From a practical viewpoint, however, using very small  $R$  would  
166 require very dense grids of trajectories to be computed, otherwise zero or very small number of  
167 trajectory encounters will occur in the entire flow domain. Numerical examples in the next  
168 section suggest that choosing  $R$  to be a fraction, up to about half of the size of the smallest  
169 features of interest work best.

170 Finally, the approximation  $V \approx N \delta V$  breaks down for sparse grids of initial positions with the  
171 insufficient number of Lagrangian particles, when  $N$  is small and  $\delta V$  is large. It also works  
172 poorly when applied to 2D divergent flows due to  $\delta V$  changing following trajectories. Numerical  
173 simulations in the next section suggest that grid spacing  $\leq R/2$  is sufficient, and that the method  
174 can also be applied to characterize mixing potential in slightly divergent two-dimensional flows.

175 Once the time scale  $T$  is identified, grid of initial positions is chosen, trajectories are computed,  
176 radius  $R$  is defined, and the number of encounters,  $N(\vec{x}_0, t_0; t)$ , is counted for each trajectory,  
177 then the encounter volume can be estimated as  $V \approx N \delta V$  and plotted as a function of the  
178 trajectory initial position  $\vec{x}_0$ . The resulting  $V$  field delineates the flow regions with different  
179 mixing properties as subdomains having different values of  $V$ .

180 II. Examples

181 We proceed to test the performance of the encounter volume technique in quantifying mixing  
182 potential for several geophysically relevant sample flows of increasing complexity, starting from  
183 a simple analytically prescribed periodically perturbed double-gyre Duffing Oscillator system,  
184 followed by a dynamically consistent solution of the PV conservation equation on a beta-plane  
185 known as the Bickley Jet, and finishing with an observationally based geostrophic velocity field  
186 in the North Atlantic derived from the sea surface height altimetry.

187 a. Duffing Oscillator

188 The Duffing Oscillator flow and its figure-eight geometry has become a standard test case for  
189 emerging techniques related to the dynamical systems theory. This flow consists of two gyres  
190 with the same sign of rotation (clockwise in our case), whose elliptic centers oscillate in time  
191 around their mean position. A hyperbolic point is located at the origin between the two gyres,  
192 and a pair of stable and unstable manifolds emanate from it forming a figure eight in the absence  
193 of the time dependent perturbation, or forming a classic homoclinic tangle in the presence of the  
194 perturbation. The velocity field is two-dimensional and incompressible and is given by  $u = y$   
195 and  $v = (x - ax^3)(1 + \epsilon \cos(\omega t + \phi))$  with  $a = 1$ ,  $\omega = 3\pi/2$ ,  $\phi = \pi/4$  and  $\epsilon = 0.1$ . With  
196 these parameters, the Poincare section (Fig. 1 bottom) shows the presence of two main regular  
197 elliptic regions with  $O(1)$  radius corresponding to the interiors of the gyres, which are embedded  
198 into a figure-eight shaped chaotic zone, within which a number of island chains with smaller  
199 regular islands are present. The winding time for most trajectories in the system is on the order of  
200  $5T_{pert}$  with  $T_{pert} = \frac{2\pi}{\omega}$ , except for trajectories near the hyperbolic point for which winding time  
201 is much longer (Fig. 1 top).

202 The encounter volume was computed for a range of trajectory integration times, from  $T = T_{pert}$   
203 (which is significantly shorter than trajectory winding time) to  $T = 50T_{pert}$  (significantly longer  
204 than trajectory winding time), and for a range of encounter radii, from  $R = 0.01 \ll R_{eddy}$   
205 (significantly smaller than the eddy core radius) to  $R = 1 \approx R_{eddy}$  (comparable to the eddy core  
206 radius). The results in Fig. 2 suggest that the encounter volume method works best for  
207 integration times longer than the trajectory winding time and encounter radius about 1/3 to 1/2 of  
208 the gyre radius (right 3 panels of the middle row). For very small encounter radius (top row),  $V$   
209 is noisy because trajectories simply do not encounter many neighbors. Thus, delineating the  
210 domain into regions with different mixing potential, as in the top right panel, requires long  
211 integration time. For  $T = 50T_{pert}$ , good agreement with the Poincare section is observed, and  
212 the use of small encounter radius allows for a precise identification of smaller regular island  
213 chains, such as the chains of 4 islands located just outside of the perimeter of both left and right  
214 eddy cores. Note that the noise in the  $V$  field can be suppressed by using a denser initial grid of  
215 trajectories, but at the cost of a more expensive computation. For very short integration times  
216 (left column) when trajectory segments are very short, the encounter volume is not capturing the

217 difference between the regular and chaotic regions. This is not surprising as velocity shear is  
218 probably a dominating factor over such small times. As the integration time increases, the  
219 difference in encounter volume becomes more pronounced between trajectories that remain  
220 within the eddy cores and trajectories that are free to move around the chaotic zone. Over a time  
221 scale of approximately one winding period (or about 5 periods of the perturbation; second  
222 column), the two regular eddy cores (blue regions with small  $V$ ) and a segment of the stable  
223 manifold (red curve emanating from the origin with largest  $V$ ) becomes clearly visible for  $R=0.2$   
224 and  $R=1$ . The revealed manifold segment becomes longer, narrower and more tangled,  
225 eventually filling up the whole chaotic zone. At the same time, the shape of the core region  
226 becomes more exact and approaches the “true” core in the Poincare section as the integration  
227 time increases to 50 periods of the perturbation. The agreement with Poincare section is excellent  
228 in the right middle panel, although the smaller island chains are not as visible as in the top right  
229 panel because of the use of a larger encounter radius that is comparable to their size (see Fig. 3).  
230 Finally, for the large encounter radius that is comparable to the size of the eddy (bottom row),  
231 the boundary region near perimeter of an eddy, within which trajectories on the inside of the  
232 eddy can encounter trajectories passing by on the outside, is as wide as the eddy itself, essentially  
233 wiping out all small scales from the  $V$  field. All of these trends are in agreement with theoretical  
234 expectations described in Section I.

235

236 In order to more clearly highlight the link between high values of  $V$  and stable (rather than  
237 unstable) manifolds, we have computed both stable and unstable manifolds for the Duffing  
238 Oscillator flow using a direct method, where we grew manifolds from a small segment starting at  
239 the hyperbolic trajectory. For the Duffing Oscillator this computation is straightforward since the  
240 the hyperbolic trajectory stays at the origin at all times. Both stable and unstable directly-  
241 computed manifolds were then superimposed on a forward-time encounter volume plot in Fig. 4.  
242 The comparison shows that, as anticipated, the encounter volume diagnostic clearly highlights  
243 stable manifolds as maximizing ridges of  $V$  computed in forward time.

244

245 With a variety of dynamical systems techniques available, it is important to understand the  
246 advantages and limitation of the different methods. We compared the encounter volume to two  
247 well-established and commonly-used methods, the Poincare section (Fig. 3) and the FTLEs (Fig.  
248 5). Since the Poincare section requires stroboscopic sampling of trajectories in time, it can only  
249 be applied to time-periodic flows, and requires that trajectories are computed over long  
250 integration time, typically thousands of the periods of the perturbation. On the other hand, it  
251 generally requires only a few parcels to be released at some key locations, rather than releasing a  
252 dense grid of initial positions, to map out the entire phase space. The encounter volume and  
253 FTLEs, on the other hand, are not limited to time-periodic flows, and also work with  
254 significantly shorter segments of trajectories (longest integration time in our simulations in Fig. 2  
255 is only 50 periods of perturbation). They are also better suited for identifying manifolds than the  
256 Poincare sectioning as they do not require any *a priori* knowledge about the location of the

257 hyperbolic trajectory. On the other hand, they require many more parcels to be released in order  
258 to map out the phase space. When applied to the same set of trajectories (same initial positions  
259 and integration times), the FTLEs and the encounter volume methods produced similar results  
260 (Fig. 5), with  $V$  being arguably better suited for 1) identifying the coherent core regions of  
261 eddies, where FTLEs have spiraling patterns that complicate the analysis, and 2) producing more  
262 continuous segments of manifolds at intermediate integration times, when FTLE-based ridges get  
263 discontinuous near the turning points of a manifold. The advantage of FTLEs, on the other hand,  
264 is that they have fewer parameters ( $T$  and grid spacing), whereas  $V$  also depends on  $R$ , and that  
265 they less expensive computationally. The more expensive computational cost of  $V$  compared to  
266 FTLEs is due to two reasons: first, the FTLEs only depend on the initial and final positions of  
267 trajectories, whereas  $V$  depends on the entire trajectory history; and second, FTLEs depend on  
268 the relative distance between a trajectory and its closest neighbors, whereas  $V$  keeps tracks of  
269 encounters with all trajectories, not just the neighboring trajectories. Thus, the cost of evaluating  
270 FTLE for each particle is independent of the total number of particles released, and the cost of  
271 evaluating  $V$  for each particle increases in proportion to the number of particles (since one needs  
272 to keep track of encounters with all particles). The calculation of  $V$  is still feasible for realistic  
273 geophysical flows, as is illustrated below. Note also that, depending on the physical question  
274 being studied, the information about the entire trajectory, not just the final and initial position,  
275 might in fact be advantageous.

276  
277 Related to issue of computational cost is the question of a sufficient grid size. We have carried  
278 out numerical simulations (Fig. 6) to investigate the dependence of the encounter volume on the  
279 grid size, and to come up with a rule of thumb recommendation regarding the appropriate grid  
280 spacing. Our simulations suggest that the encounter volume values (approximated by  $V \approx$   
281  $N dV$ ) are relatively insensitive to the variations of grid spacing between 1/10 and 1/2 of the  
282 encounter radius (with the encounter radius being a fraction of the size of the feature of interest,  
283 as suggested by Fig. 2), and that the major effect of a coarser grid is the degraded resolution of  
284 the resulting  $V$  map, rather than incorrect  $V$  values.

285

## 286 b. Bickley Jet

287 The meandering Bickley jet flow is an idealized, but linearly dynamically consistent, model for  
288 the eastward zonal jet in the Earth's Stratosphere (del-Castillo-Negrete and Morrison, 1993;  
289 Rypina et al., 2007a; Rypina et al., 2011). This flow consists of a steady eastward zonal jet on  
290 which two eastward propagating Rossby-like waves are superimposed. All flow parameters used  
291 here are identical to those used in our previous 2007 and 2011 papers. In the reference frame  
292 moving at a speed of one of the waves, the flow consists of a steady background velocity subject  
293 to a time periodic perturbation. The background looks like a meandering jet, with three  
294 recirculation gyres to the north and south of the jet core. Between the recirculation gyres, there  
295 are three hyperbolic points with the associated stable and unstable manifolds. Under the



296 influence of the time-periodic perturbation imposed by the second wave, heteroclinic tangles are  
297 formed by the manifolds emanating from different hyperbolic regions between the recirculations,  
298 and a chaotic zone emerges on either side of the jet. The manifolds, however, cannot penetrate  
299 through the jet core, which remains regular and acts as a transport barrier separating the northern  
300 and southern chaotic zones. All of these features are clearly visible in the Poincare section shown  
301 in Fig. 4 (top). The bottom subplot shows the  $V$  field computed using the encounter radius  
302  $R=5*10^5$ , which is about half of the recirculation region radius, and using trajectory integration  
303 time on the order of a few winding times within the recirculations. As expected, the encounter  
304 volume identified 6 recirculation regions and the jet core as zones with small mixing potential  
305 (blue). 6 blue recirculation regions are embedded into two distinct chaotic zones with enhanced  
306 mixing potential (yellow-red) on either side of the jet. Mixing potential is the largest (red) along  
307 the segments of stable manifolds emanating from the hyperbolic trajectories between  
308 recirculations.

### 309 c. Altimetry-based velocity in the meandering Gulf Stream region

310 Past its separation point from the coast at Cape Hatteras, the strong and narrow Gulf Stream  
311 current turns off-shore, where it loses its coherence, broadens and weakens, and starts to  
312 meander. Some of the meanders then grow and eventually detach from the current forming  
313 strong mesoscale eddies known as the Gulf Stream rings. On 11 July, 1997 a number of such  
314 Gulf Stream rings of various strength and size and at different stages of their lifetime were  
315 clearly present both north and south of the Gulf Stream Extension Current (Fig. 7).

316 The flow in the Gulf Stream Extension region, with a non-steady meandering jet and the Gulf  
317 Stream rings and recirculations to the north and south of the jet core, has a lot in common, at  
318 least qualitatively, with the Bickley Jet example. Unlike the idealized model, however, the real  
319 Gulf Stream rings have finite lifetimes, and the jet is not periodic in the zonal direction.  
320 Nevertheless, many of the qualitative features of the Bickley Jet's  $V$  field hold in this example.  
321 Specifically, trajectories inside coherent eddy cores have smaller encounter volumes than the  
322 eddy peripheries, and the jet centerline has smaller encounter volume than the flanks.

323 The velocity field that we used was downloaded from the AVISO website  
324 (<http://www.aviso.altimetry.fr/en/data/products/sea-surface-height-products/global.html>) and  
325 corresponds to their gridded product with  $\frac{1}{4}$  deg spatial resolution and temporal step of 1 day.  
326 This velocity is based on the altimetric sea surface height measurements made from satellites.  
327 The heights were converted into velocities using geostrophic approximation. For the encounter  
328 volume estimation, trajectories were seeded on a regular grid with  $dx = dy \cong 0.06$  deg on 11  
329 July 1997 and were integrated forward in time for 90 days using a fifth-order variable-step  
330 Runge-Kutta integration scheme with bi-linear interpolation between grid points in space and  
331 time. The encounter radius was chosen to be 0.3 deg, which is about a third of the radius of a  
332 typical 200-meter-wide Gulf Stream ring.

333 The encounter volume was estimated for three different integration times,  $T=30$  days, 60 days  
334 and 90 days (Fig. 7). The  $V$  field clearly indicates that a number of Gulf Stream rings were  
335 present on both sides of the meandering jet. Among those, two strongest ones can be seen at  
336 54W, 36N and 52W, 41N, with the low- $V$  (blue) core and high- $V$  (red) periphery. As the  
337 integration time increases from 30 days to 90 days, the Gulf Stream rings generally start to leak  
338 fluid, their cores start to lose coherence, and the encounter volume within eddy cores starts to  
339 increase as more and more trajectories escape into the eddy surroundings over time. After a 90  
340 day integration time, only a few Gulf Stream rings still possess coherent cores, whereas others  
341 become leaky throughout. Even for the two strongest rings, the coherent Lagrangian cores  
342 (bluish regions with  $V \approx 0$ ) shrink down in size and, importantly, become significantly smaller  
343 than what the Eulerian velocity field would suggest. The core of the northern eddy also gets  
344 shifted slightly to the east from the corresponding Eulerian stagnation point, and becomes  
345 deformed into a non-convex sickle-like shape.

346  
347 The overall leakiness of the Gulf Stream rings and the small extent of their coherent Lagrangian  
348 core regions suggests that the coherent transport by the Gulf stream rings (and maybe by  
349 mesoscale eddies in general) over time intervals of a few months or longer may be significantly  
350 smaller than what is generally anticipated from Eulerian diagnostics based on closed streamlines  
351 or Okubo-Weiss type criteria. Interestingly, the prominent red rings (large  $V$  values) around the  
352 eddy cores in Fig. 7 indicate that significant contribution to transport by Lagrangian eddies may  
353 be due to the high-mixing-potential peripheries rather than the coherent cores themselves.

354  
355 To visualize the Lagrangian evolution of the core regions and to illustrate the eddy leakiness, we  
356 extracted trajectories from the core of the northern eddy in Fig. 7(left) (i.e., trajectories with  
357  $V < 6000 \text{ km}^2$  from the 30-day-long  $V$  field), and plotted their subsequent positions after 30  
358 days, 60 days and 90 days. The results in Fig. 8 confirm that the eddy core stays completely  
359 coherent over 30 days (i.e., all trajectories stay together), but starts to deteriorate at 60 days, with  
360 only a small fraction of the initial patch still staying together and the rest of the patch dispersing  
361 and forming long and narrow filaments.

362  
363 The jet region, although noisy, seems to suggest higher  $V$  near the flanks and smaller  $V$  near the  
364 centerline. The center region is not as well-defined as in the Bickley Jet example, possibly  
365 because the Gulf Stream inhibits but does not fully prevent the meridional transport in this  
366 region, and because our encounter radius might have been too large to reveal the central region,  
367 if the true center region was narrower than  $2R$  (0.6 degrees). Finally, the  $V$  field suggests that the  
368 mixing potential of the flow is not symmetric with respect to the jet centerline and is higher on  
369 the northern side. It would be interesting to see if this is a general property of the flow in this  
370 region or if this phenomenon is specific to the time interval chosen. This investigation is left for  
371 future study.

372

373 III. Encounter volume for some simple flow regimes

374 By analogy with molecular diffusion, eddy diffusivity,  $K$ , is often used to characterize the eddy-  
375 induced downgradient tracer transfer in realistic geophysical fluid flows (LaCasce 2008; Vallis,  
376 2006; Rypina et al., 2015; Kamenkovich et al., 2016). Because of the simplicity of this approach,  
377 the majority of existing non-eddy-resolving oceanic numerical models are diffusion based,  
378 despite the somewhat questionable assumptions underlying this approach. An analytical  
379 connection between the encounter volume and diffusivity would thus be useful for the  
380 parameterizations in numerical models.

381 Although we have not been able to find an analytical expression connecting  $V$  and  $K$ , we outline  
382 below some steps in that direction that help framing the problem. Let us start by considering a  
383 simple diffusive random walk particle motion in two-dimensions, where particles take steps of  
384 fixed length  $L$  in random directions at time intervals  $\Delta t$ . For such process, the single particle  
385 dispersion,

$$386 \quad D = \langle (x - x_0)^2 + (y - y_0)^2 \rangle,$$

387 which characterizes the mean square displacement from the particle's initial position  $(x_0, y_0)$ ,  
388 grows in proportion to the number of steps,  $n$ , i.e.,

$$389 \quad D = Kn\Delta t,$$

390 with the proportionality coefficient,  $K = L^2 / \Delta t$ , denoting the diffusivity. The angular brackets  
391 denote ensemble average. We are interested in finding an analytical expression for the encounter  
392 number, i.e., the number of particles that pass within radius  $R$  from a reference particle over time  
393  $T$ , as a function of  $K$  and  $T$ .

394 It is convenient to move to a reference frame that is tied to a reference particle, which would then  
395 always stay at the origin, while other particles would be involved in a random walk motion. The  
396 problem of finding the encounter number then reduces to counting the number of particles that  
397 come within radius  $R$  from the origin over time  $T$  in the moving frame. The properties of the  
398 random walk process in the moving reference frame are different from those in the stationary  
399 frame. Specifically, the direction of each step in the moving reference frame still remains random  
400 (since it is a sum of two random variables, each uniformly distributed within an interval  $[0; 2\pi]$ ),  
401 but the step size is no longer fixed. Instead, the step size can be written as

$$402 \quad L_m^2 = dx_m^2 + dy_m^2 = (dx - dx_{ref})^2 + (dy - dy_{ref})^2 = 2L^2 - 2(dx dx_{ref} + dy dy_{ref}),$$

403 where  $dx$  and  $dy$  correspond to displacements of a particle in x and y directions at some instance  
404 in time, and subscripts  $m$  and  $ref$  denote the moving reference frame and the reference trajectory,

405 respectively. Denoting the angle in which the step is taken by  $\varphi$ , the displacements are  $dx =$   
 406  $L \cos \varphi$ ,  $dy = L \sin \varphi$ ,  $dx_{ref} = L \cos \varphi_{ref}$ ,  $dy_{ref} = L \sin \varphi_{ref}$  leading to

407  $L_m = 2L \sin \alpha$ , where  $\alpha = \frac{\varphi - \varphi_{ref}}{2}$ . Since both  $\varphi$  and  $\varphi_{ref}$  are random variables uniformly  
 408 distributed between 0 and  $2\pi$ ,  $\alpha$  is a random variable with a flat pdf distribution  $\in [0; \pi]$ .

409 This change in the step size between the stationary and moving frames leads to a doubling of the  
 410 diffusivity in the moving reference frame. To show this, we write down the dispersion in the  
 411 moving frame as

$$\begin{aligned} D_m &= \langle (x_m - x_{0_m})^2 + (y_m - y_{0_m})^2 \rangle = \\ &= \langle (x - x_{ref} - x_0 - x_{0ref})^2 + (y - y_{ref} - y_0 - y_{0ref})^2 \rangle = \\ &= D - 2 \Delta x_{ref} \langle \Delta x \rangle - 2 \Delta y_{ref} \langle \Delta y \rangle + \Delta x_{ref}^2 + \Delta y_{ref}^2 = \\ &= D + \Delta x_{ref}^2 + \Delta y_{ref}^2, \end{aligned}$$

412 where  $\Delta x = x - x_0$  is the deviation from the initial position in the stationary frame and similarly  
 413 for  $\Delta y$ ,  $\Delta x_{ref}$  and  $\Delta y_{ref}$ . We have used  $\langle \Delta x \rangle = \langle \Delta y \rangle = 0$  to get the last equality. When  
 414 averaged over many reference trajectories,  $\langle \Delta x_{ref}^2 + \Delta y_{ref}^2 \rangle = D$  since in the stationary  
 415 reference frame the reference particle is doing a random walk just like all other particles, so that  
 416  $\langle D_m \rangle = 2D$ , or, equivalently,  $\langle K_m \rangle = 2K$ .

417 We thus seek an expression for the number of particles that are involved in a random walk  
 418 process with diffusivity  $2K$  and that come within an encounter radius  $R$  from the origin during  
 419 their first  $n$  steps ( $n$  plays the role of discretized integration time). This quantity is related to the  
 420 first passage time density, which characterizes the probability that a particle has first reached an  
 421 absorbing boundary (often referred to as a cliff in statistics) at time  $t$ , and its integral quantity,  
 422 called the survival probability, which characterizes the probability that a particle has not come in  
 423 contact with absorbing boundary over time  $t$  (i.e., it survived after time  $t$  without falling off a  
 424 cliff). So far, however, we have not been able to complete the derivation and we leave this  
 425 development for a future investigation.

426 Numerical Monte-Carlo simulations of a random walk process suggest that the dependence of  
 427 the encounter number (and encounter volume) on the integration time  $T$  is not a linear and not a  
 428 square-root function. The power-law least square fit of the form  $V \sim T^\alpha$  returns  $\alpha$  values between  
 429 0.64 and 0.78 for a wide variety of  $R$  and  $K$ , each spanning an order of magnitude interval of  
 430 values. Similarly, the power-law least square fit  $V \sim K^\beta$  and  $V \sim R^\gamma$  yield  $\beta \cong 0.664$  and  $\gamma \cong$   
 431  $0.69$ .

432 The ballistic spreading that is dominated by a local velocity shear is another commonly-  
 433 encountered spreading regime. There, the separation between particles grows in proportion to  
 434 time. Ballistic spreading can often be observed in nonsteady realistic oceanic flows at time scales  
 435 that are much shorter than the onset of diffusive spreading (which develops after a trajectory  
 436 samples multiple different eddies or other flow features). To derive a connection between  
 437 encounter volume and velocity shear, consider a trajectory that is advected by a flow field with  
 438 constant meridional velocity shear,  $\gamma$ , of zonal velocity. In a reference frame moving with a  
 439 reference trajectory the velocity profile is,  $u(y) = \gamma y$  where  $u$  denotes the x-component of  
 440 velocity, and the encounter volume becomes

$$441 \quad V \cong N dx dy = 2 \int_0^R dy \int_R^{R+x(T)} dx = 2 \int_0^R dy \int_0^T u(y) dt = \gamma R^2 T, \quad (2)$$

442 suggesting a linear growth with time for a ballistic regime. Note that expression (2) quantifies the  
 443 encounter volume as a volume of fluid that is initially located outside of the encounter sphere  
 444 and that passes through the sphere over time  $T$ . To include the volume of fluid that is initially  
 445 located within the encounter sphere (or within the encounter circle in this 2D case), one needs to  
 446 add  $\pi R^2$  to expression (2). The contribution of this term gets negligibly small as  $T \rightarrow \infty$ .  
 447 Expression (2) has been tested numerically and shows good agreement with the numerically-  
 448 estimated encounter volume for a linear shear flow (Fig. 10(right)).

449 The steady linear saddle flow with a constant strain rate  $\alpha$  and velocities

$$450 \quad u = \alpha x; v = -\alpha y. \quad (3)$$

451 is another commonly-considered example often used to approximate the vicinity of a hyperbolic  
 452 trajectory in more complicated non-steady non-linear situations. A unique property of this flow is  
 453 that the velocity profile is unchanged in any reference frame moving with a trajectory. This can  
 454 be shown by applying the coordinate transformation,  $\hat{x} = x - x_{tr}(t)$ ;  $\hat{y} = y - y_{tr}(t)$ , where  
 455  $(x; y)$  are coordinates in a stationary frame,  $(\hat{x}; \hat{y})$  are coordinates in a moving frame, and  
 456  $(x_{tr}(t); y_{tr}(t))$  is the trajectory. The velocity in a moving frame is then

$$457 \quad \begin{aligned} \hat{u} &= u - \frac{dx_{tr}}{dt} = \alpha x - \frac{dx_{tr}}{dt} = \alpha \hat{x} + \alpha x_{tr} - \frac{dx_{tr}}{dt} = \alpha \hat{x} \\ \hat{v} &= v - \frac{dy_{tr}}{dt} = -\alpha y - \frac{dy_{tr}}{dt} = -\alpha \hat{y} - \alpha y_{tr} - \frac{dy_{tr}}{dt} = -\alpha \hat{y} \end{aligned} \quad (4)$$

458 where the last equality holds because  $\frac{dx_{tr}}{dt} = \alpha x_{tr}$ ;  $\frac{dy_{tr}}{dt} = -\alpha y_{tr}$ . Thus, without loss of  
 459 generality, we can consider a flow in a reference frame moving with a reference trajectory that is  
 460 located at the origin. The encounter volume that comes within a radius  $R$  of the origin over the  
 461 time interval  $T$  can be written as

462  $V \cong N dx dy = \int_0^T F_{\perp}(t) dt,$   
 463 (5)

464 where  $dx$  and  $dy$  denote the grid spacing between neighboring trajectories, and the flux of  
 465 trajectories entering the circle is given by

466  $F_{\perp} = \int u_{\perp} ds.$  (6)

467 Again, as in our treatment of the linear shear flow, expression (5) does not include the volume of  
 468 fluid that is initially located within the encounter sphere (or encounter circle in this 2D case), but  
 469 only the volume that was initially located outside but passes through the sphere over time  $T$ . The  
 470 contribution of that fixed volume ( $\pi R^2$ ), gets negligibly small as  $T \rightarrow \infty$ . Here  $u_{\perp}$  is the inward-  
 471 looking normal component of velocity at a circle of radius  $R$ , and  $ds$  is an infinitesimal segment  
 472 of the circle arc. From symmetry, the flux is the same in each of the 4 quadrants so we will  
 473 consider the 1<sup>st</sup> quadrant only. From geometry (Fig. 11),

474  $u_{\perp} = -u \sin \beta - v \cos \beta = \alpha R (\cos^2 \beta - \sin^2 \beta)$  and  $ds = R d\beta$ , leading to

475  $F_{\perp}^{1st\ quad} = \alpha R^2 \int_0^{\pi/4} (\cos^2 \beta - \sin^2 \beta) d\beta = \frac{\alpha R^2}{2}$  (7)

476 and

477  $V^{1st\ quad} = \int_0^T F_{\perp}(t) dt = \alpha R^2 T / 2.$  (8)

478 Adding the other 3 quadrants then gives

479  $V = 2\alpha R^2 T.$  (9)

480 Numerical simulations of the encounter volume in a linear strain flow show excellent agreement  
 481 with theoretical expression (9) (Fig. 10(left)).

482 The linear growth of the encounter volume with time in the linear shear and linear strain flows  
 483 could be anticipated by noting that both flows are steady in a reference frame moving with a  
 484 reference trajectory, and all particles only encounter the origin once and never come back. Thus,  
 485 the flux through the encounter circle is constant in time and the encounter volume, which is a  
 486 time-integral of flux, is proportional to time. The random walk flow seems to be different  
 487 because the particles can encounter the reference trajectory more than once, leading to a non-  
 488 steady flux of first encounters and a non-linear time dependence of the encounter volume.

489 IV. Mixing potential for a specified tracer: the  $\mathbf{u}^*$ -approach

490 The above examples are centered on mixing potential of a flow field, but there may be value in  
 491 computing the encounter volume for swarms of trajectories of biological organisms, drifting  
 492 sensors, and other non-Lagrangian trajectories. For example, if one is interested in the actual  
 493 transport of scalar properties such as heat, salt, or vorticity, then it may be useful to calculate  $V$   
 494 using a velocity field that is directly linked to the vector flux of the scalar of interest. This  
 495 approach has been used in connection with heat transport in advective/diffusive flow (Bejan,  
 496 1995; Costa, 2006; Mahmud and Fraser 2007; Mukhopadhyay et al., 2002, and Speetjens, 2012)  
 497 and more recently with the transport of more general scalars in forced and dissipative (and  
 498 possibly turbulent) flows (Pratt et al., 2016). The central idea is to define velocity field  $\mathbf{u}^*$   
 499 based on the (known) flux  $\mathbf{F}$  of a scalar with concentration  $C$ . Here bold quantities denote  
 500 vectors. The concentration is assumed to obey a conservation equation of the form

$$501 \quad \frac{\partial C}{\partial t} = -\nabla \cdot \mathbf{F} + S, \quad (10)$$

502 where  $S$  contains the sources and sinks of  $C$ . The velocity  $\mathbf{u}^*$  is defined as the velocity of a  
 503 hypothetical flow in which the flux of  $C$  is purely advective:  $\mathbf{F} = C\mathbf{u}^*$ . Pratt et al., 2016 show  
 504 that, in the absence of sources or sinks of  $C$ , that the total amount of  $C$  contained within any  
 505 material boundary advected by this hypothetical flow is conserved:  $\frac{d}{dt} \int_V C dV = 0$ . Thus  $\mathbf{u}^*$  is  
 506 linked to scalar property fluxes while  $\mathbf{u}$  is limited to fluid volume (or area) fluxes.

507 If indeed  $\mathbf{F}$  is due entirely to advection by the actual fluid velocity field  $\mathbf{u}$ , then  $\mathbf{u}^* = \mathbf{u}$ , but more  
 508 generally  $\mathbf{F}$  will contain contributions from eddy fluxes, molecular or sub-grid diffusion, and  
 509 even forcing and dissipation terms that can be expressed as the divergence of a flux. In addition,  
 510  $\mathbf{F}$  may be augmented by the addition of any non-divergent vector without altering Eq. (3). As  
 511 shown by Speetjens (2012), this lack of uniqueness can be dealt with by defining a physically  
 512 relevant reference scalar distribution and then focusing on the flux of the scalar anomaly, an  
 513 approach we adapt below. Thus, by estimating the encounter volume  $V$  for trajectories of the  $\mathbf{u}^*$   
 514 field, one is quantifying the rate at which different ‘parcels’ of tracer anomaly are brought into  
 515 contact with each other. An example is presented next.

516 a. Example: encounter volume for a tracer with a specified initial distribution in a  
 517 Bickley Jet flow

518 In this subsection we apply the encounter volume diagnostic to quantify the mixing potential for  
 519 a specific tracer in the Bickley Jet flow. Our goal is to describe an example where the  $\mathbf{u}^*$  field for  
 520 a given tracer is significantly different from the flow velocity  $\mathbf{u}$ , and where the corresponding  
 521 encounter volume field for a given tracer,  $V^*$ , is significantly different from the water particle  
 522 trajectory-based encounter volume  $V$ .

523 Consider the Bickley Jet flow with the same parameters as in II(b) and assume that one is  
 524 interested in a tracer that, at initial time  $t_0$ , has uniform value  $c_0$  south of the jet and has a  
 525 constant meridional gradient north of the jet, i.e.,  $C_0 = c_0 + 0.5y(\text{sign}(y - 5 * 10^5) + 1)$  with

526  $c_0 = 1$ . Ignoring the diffusive terms, the tracer evolution is governed by the advection  
 527 equation  $\frac{\partial C}{\partial t} = -\nabla(\mathbf{u} \cdot C)$ , where  $\mathbf{u}$  is the Bickley Jet flow velocity. Since the jet core acts as a  
 528 transport barrier separating the northern and southern chaotic zones, this tracer will rapidly  
 529 filament and develop high property gradients north of the jet, but will remain uniform south of  
 530 the jet. So, despite the fact that the mixing potential of the Bickley Jet flow is exactly the same  
 531 on both sides of the jet (Fig. 7(bottom)), stirring will not lead to mixing for this particular tracer  
 532 distribution south of the jet, where tracer gradient is zero, thus leading to zero mixing potential  
 533 for this particular tracer. We seek to capture this effect via applying the encounter volume-based  
 534 mixing diagnostic to the corresponding  $\mathbf{u}^*$  field for this tracer.

535 In the spirit of Speetjens (2016) we regard  $c_0$  as the reference concentration, here constant, and  
 536 define  $\mathbf{F}$  to be the flux of a tracer anomaly:  $\mathbf{F} = \mathbf{u} \cdot (C - c_0)$ . The resulting  $\mathbf{u}^* = \frac{\mathbf{F}}{c} = \mathbf{u} \left(1 - \frac{c_0}{c}\right)$   
 537 is zero south of the jet where  $C = c_0$  and is approximately equal to  $\mathbf{u}$  north of the jet where  
 538  $C \gg c_0$ , leading to the  $\mathbf{u}^*$ -based encounter number  $V^* = 0$  south of the jet and  $V^* \approx V$  north of  
 539 the jet.

540 This behavior was further validated numerically in Fig. 12, where we first numerically simulated  
 541 the evolution of this tracer in the Bickley Jet flow, then estimated  $\mathbf{u}^*$ , counted  $N^*$  and estimated  
 542  $V \cong NdV$  for trajectories advected by the  $\mathbf{u}^*$  field. The result confirms that mixing potential for  
 543 this tracer is zero south of the jet,  $V^* = 0$ , whereas north of the jet  $V^*$  is very close to  $V$  from  
 544 Fig. 7(bottom). Thus, by combining the  $\mathbf{u}^*$  approach with the encounter volume idea, we were  
 545 able to correctly capture the mixing potential for a specific tracer.

## 546 V. Summary and discussion

547 When water parcels come in direct contact with each other, they can exchange water properties,  
 548 leading to mixing. The trajectory encounter volume,  $V$ , quantifies the volume of fluid that passes  
 549 close to a reference trajectory over a time interval  $t_0 < t < t_0 + T$ . Thus, the encounter volume  
 550 is proportional to, and can be used as a measure of, the mixing potential of a flow. For  
 551 incompressible flows densely seeded with particles, the encounter volume can be approximated  
 552 by  $V \cong N\delta V$  where  $N$  is the encounter number, i.e., the number of trajectories that come  
 553 within radius  $R$  from the reference trajectory over time  $t_0 < t < t_0 + T$ , and  $\delta V$  is a small  
 554 volume element.

555 The encounter volume diagnostic was tested in 3 flows with increasing complexity, the Duffing  
 556 Oscillator, the Bickley Jet, and the altimetry-based velocity in the Gulf Stream Extension region.  
 557 In all cases,  $V$  was smaller within cores of coherent eddies and jets, where mixing potential was  
 558 low, and  $V$  was larger in chaotic zones near the peripheries of the eddies and at the flanks of the  
 559 meandering jets, where the mixing potential of the flow was high.

560 Similar to finite-time Lyapunov exponents (FTLEs) that are commonly used to delineate regions  
 561 with qualitatively different motion (Haller, 2002; Shadden et al., 2005; Lekien and Ross, 2010),



562  $V$  depends on the trajectory starting time,  $t_0$ , allowing tracking the evolution of oceanic features  
563 by repeating the calculation at different  $t_0$ , and on the trajectory integration time,  $T$ , revealing  
564 different structures that impact the mixing potential of the flow from time  $t_0$  to time  $t_0 + T$ .  
565 Specifically, longer segments of stable/unstable manifolds emanating from hyperbolic regions  
566 are revealed for longer  $T$  in forward/backward time. In the long- $T$  limit, when both the stable and  
567 unstable manifolds densely fill the entire chaotic zone,  $V$  approaches a constant equaling to the  
568 volume of the chaotic zone.

569  $V$  also depends on the encounter radius  $R$ , which defines how close two trajectories need to be in  
570 order to be counted as an encounter. Analytic arguments and numerical simulations both suggest  
571 that  $R$  on the order of a fraction ( $\sim 1/3$ ) of the radius of the smallest feature of interest should  
572 work well in most cases.

573 Finally, while  $V$  was initially introduced in the continuous limit of infinitely many infinitely  
574 small fluid elements (i.e., infinitely dense grid of initial positions), its approximation  $V \cong N\delta t$   
575 depends on the initial spacing between neighboring trajectories. Numerical simulations suggest  
576 that this approximation works well for grid spacing as large as  $R/2$  (with the appropriately  
577 chosen  $R$  as discussed above), and that the major effect of increasing the grid spacing is in the  
578 degraded resolution of the resulting  $V$ -map rather than incorrect  $V$  values.

579 As with FTLEs, complexity measures (Rypina et al., 2011), Lagrangian descriptors (Mendoza et  
580 al., 2014) and other techniques from the dynamical systems theory (Beron-Vera et al., 2013;  
581 Budisic and Mezic, 2012; Froyland et al., 2007; Haller et al., 2016),  $V$  can be computed for  
582 forward and backward in time trajectories, with the backward computation revealing unstable  
583 manifolds. Our encounter number could plausibly be related, in a limiting case, to the mixing  
584 geometry of Karrash and Keller, 2017.

585 For a ballistic spreading regime dominated by the velocity shear  $\gamma$ , and for the linear saddle flow  
586 with a constant strain  $\alpha$ ,  $V$  was shown to be proportional to  $\gamma t$  and  $\alpha t$ , respectively. The linear  
587 growth of the encounter number with time for the linear shear and linear strain flows is a  
588 consequence of the steady flux of first encounters through the encounter circle.

589 An analytical connection between the encounter volume and a widely-used measure of mixing,  
590 the diffusivity  $K$ , would be a desirable result for parameterizing the effects of eddies in  
591 numerical models. Some initial developments towards deriving such a formula were outlined for  
592 a diffusive random walk process. It was shown numerically that the dependence of  $V$  on time is  
593 non-linear, but numerical simulations were too inconclusive to make further inferences.

594 The mixing potential is the property of the flow field and characterizes the intensity of stirring,  
595 whereas the actual tracer mixing depends both on the flow and the tracer. For example, no tracer  
596 mixing will occur if the tracer gradient is zero, even if the mixing potential of the flow is high.  
597 To address this, we have proposed combining the encounter number diagnostic with the  $\mathbf{u}^*$ -

598 approach of Pratt et al, 2016 for characterizing the mixing potential for a specific tracer  $C$ .  $\mathbf{u}^*$   
599 depends on, and includes information about, the tracer fluxes. In the absence of sources and sinks  
600 of  $C$ , the amount of tracer is conserved within any Lagrangian volume advected by  $\mathbf{u}^*$ , so the  
601 encounter volume  $V^*$  computed for trajectories advected by  $\mathbf{u}^*$  can be used to quantify the  
602 mixing potential for a specific tracer. An example was presented where  $V^*$  for a specified tracer  
603 distribution in the Bickley Jet flow was significantly different from  $V$  in a large part of the  
604 domain.

605 The encounter volume is a frame-independent quantity because it is based on relative distances  
606 between water parcel trajectories, rather than on properties of isolated trajectories. The encounter  
607 volume values do not change under orthogonal transformations of coordinates, i.e., under  
608 rotations and translations of a reference frame. This is a desirable property because the ability of  
609 a flow to mix tracers should not depend on the reference frame.

610 The encounter volume and, more generally, encounter mass ideas presented in this paper are not  
611 restricted to two dimensions and can be used to quantify mixing potential in three-dimensional  
612 flows. This framework also does not require incompressibility and can work with unstructured  
613 irregular grids. The investigation of the performance of the method in quantifying mixing  
614 potential of a flow in such more complicated cases is left for a future study.

615 **Acknowledgments:** This work was supported by the NSF grants OCE-1154641, OCE-1558806  
616 and EAR-1520825, ONR grant N00014-11-10087 and NASA grant NNX14AH29G.

617

618

619

620

621

622

623

624

625

626

627

628

629 **References:**

- 630 Allshouse, M. R. and J.-L.T., Detecting coherent structures using braids, *Physica D* **241** (2), 95–  
631 105, January 2012.
- 632 Bejan, A.,1995. *Convection Heat Transfer*, Wiley, New York (1995).
- 633 Beron-Vera, F. J., Wang, Y., Olascoaga, M. J., Goni, J. G., and G. Haller, “Objective detection  
634 of oceanic eddies and the Agulhas leakage,” *J. Phys. Oceanogr.* 43, 1426–1438 (2013).  
635
- 636 Budisic, M. and Mezic, I., “Geometry of the ergodic quotient reveals coherent structures in  
637 flows,” *Physica D* 241, 1255–1269 (2012).  
638
- 639 Costa, V.A.F. 2006. Bejan’s heatlines and masslines for convection visualization and analysis,  
640 *Appl. Mech. Rev.* **59**, 127.
- 641 del-Castillo-Negrete, D., and P. J. Morrison, 1993: Chaotic transport by Rossby waves in shear  
642 flow. *Phys. Fluids A*, **5**, 948–965.  
643
- 644 Froyland, G., Padberg, K., England, M. H., and Treguier, A. M., “Detection of coherent oceanic  
645 structures via transfer operators,” *Phys. Rev. Lett.* 98, 224503 (2007).  
646
- 647 Froyland, G. and K. Padberg-Gehle. Finite-time entropy: a probabilistic approach for measuring  
648 nonlinear stretching. *Physica D*, 241(19):1612-1628, 2012  
649
- 650 Haller, G.: Lagrangian coherent structures from approximate velocity data, *Phys. Fluid*, 14,  
651 1851–1861, 2002.  
652
- 653 Haller, G., A. Hadjighasem, M. Farazmand and F. Huhn, 2016: “Defining coherent vortices  
654 objectively from the vorticity,” *J. Fluid Mech.* (2016), vol. 795, pp. 136\_173.  
655 doi:10.1017/jfm.2016.151  
656
- 657 Kamenkovich, I., I. Rypina, and P. Berloff, 2015: Properties and Origins of the Anisotropic  
658 Eddy-Induced Transport in the North Atlantic. *J. Phys. Oceanogr.*, **45**, 778–791, doi:  
659 10.1175/JPO-D-14-0164.1.  
660
- 661 Karrash, D., and J. Keller, 2017: A geometric heat-flow theory of Lagrangian coherent  
662 structures. NPG, *submitted*  
663
- 664 LaCasce, J. H., 2008: Lagrangian statistics from oceanic and atmospheric observations.  
665 *Transport and Mixing in Geophysical Flows*, J. B. Weiss and A. Provezale, Eds., Springer, 165–  
666 228. Cambridge University Press, 745 pp.  
667

668 Lekien, F. and Ross, S. D.: The computation of finite-time Lyapunov exponents on unstructured  
669 meshes and for non- Euclidean manifolds, *Chaos*, 20, 017505, doi:10.1063/1.3278516, 2010  
670

671 Mahmud, S. , R. A. Fraser, 2007. Visualizing energy flows through energy streamlines and  
672 pathlines, *Int. J. Heat Mass Transfer* **50**, 3990.

673 Mendoza, C., Mancho, A. M., and Wiggins, S., “Lagrangian descriptors and the assessment of  
674 the predictive capacity of oceanic data sets,” *Nonlinear Process. Geophys.* 21, 677–689 (2014).  
675

676 Mukhopadhyay, A., X. Qin, S. K. Aggarwal, I. K. Puri, 2002. On extension of “heatline” and  
677 “massline” concepts to reacting flows through use of conserved scalars, *ASME J. Heat Transfer*  
678 **124**, 791.

679 Pratt, L., R. Barkan, and I. Rypina, 2016: “Scalar flux kinematics,” *Fluids* 2016, 1, 27;  
680 doi:10.3390/fluids1030027  
681

682 Rypina, I. I., Scott, S. E., Pratt, L. J., and Brown, M. G., “Investigating the connection between  
683 complexity of isolated trajectories and lagrangian coherent structures,” *Nonlinear Proc. Geophys.*  
684 18, 977–987 (2011).  
685

686 Rypina, I. I., Brown, M. G., Beron-Vera, F. J., Kocak, H., Olascoaga, M. J., and  
687 Udovydchenkov, I. A.: On the Lagrangian dynamics of atmospheric zonal jets and the  
688 permeability of the Stratospheric Polar Vortex, *J. Atmos. Sci.*, 64, 3593–3610,  
689 2007a.

690 Rypina, I., I. Kamenkovich, P. Berloff, and L. Pratt, 2012: Eddy-induced particle dispersion in  
691 the near-surface North Atlantic. *J. Phys.*  
692 *Oceanogr.*, 42, 2206–2228, doi:10.1175/JPO-D-11-0191.1.

693 Speetjens, M. F. M., 2012. A generalised Lagrangian formalism for thermal analysis of laminar  
694 convective heat transfer, *Int. J. Therm. Sci.* **61**, 79.

695 Shadden, S. C., Lekien, F., and Marsden, J. E.: Definition and properties of Lagrangian coherent  
696 structures from finite-time Lyapunov exponents in two-dimensional aperiodic flows, *Physica D*,  
697 212, 271–304, 2005.  
698

699 Vallis, G. K., 2006: *Atmospheric and Oceanic Fluid Dynamics*.  
700  
701  
702  
703  
704

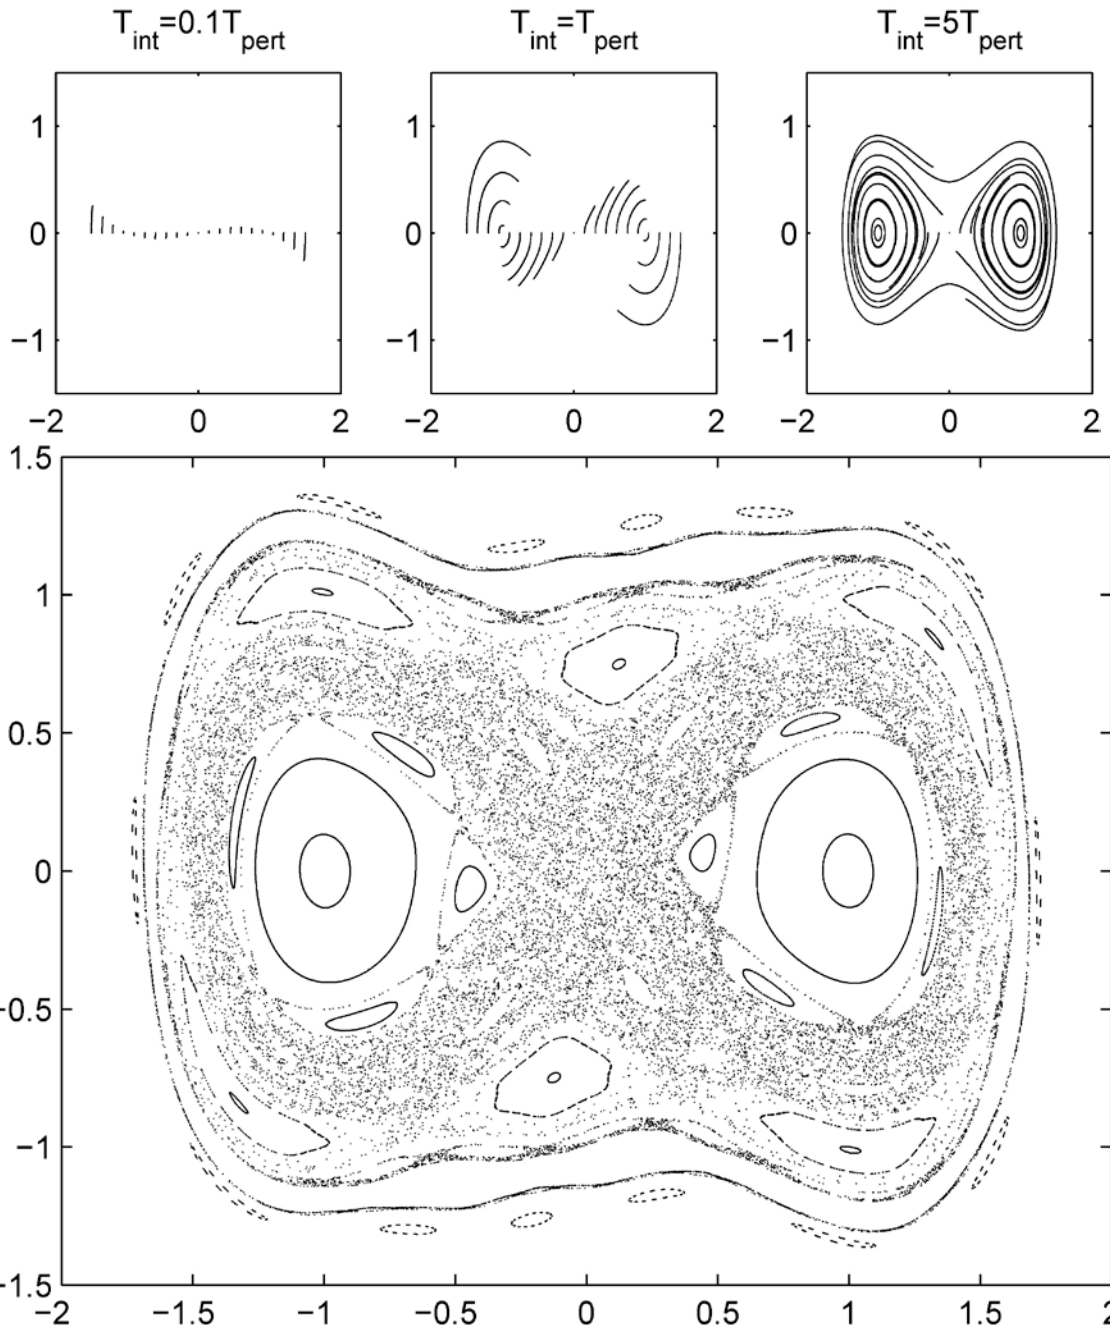

705

706

707

708

**Figure 1. Trajectory segments for different integration times (top) and Poincaré section (bottom) for the Duffing Oscillator**

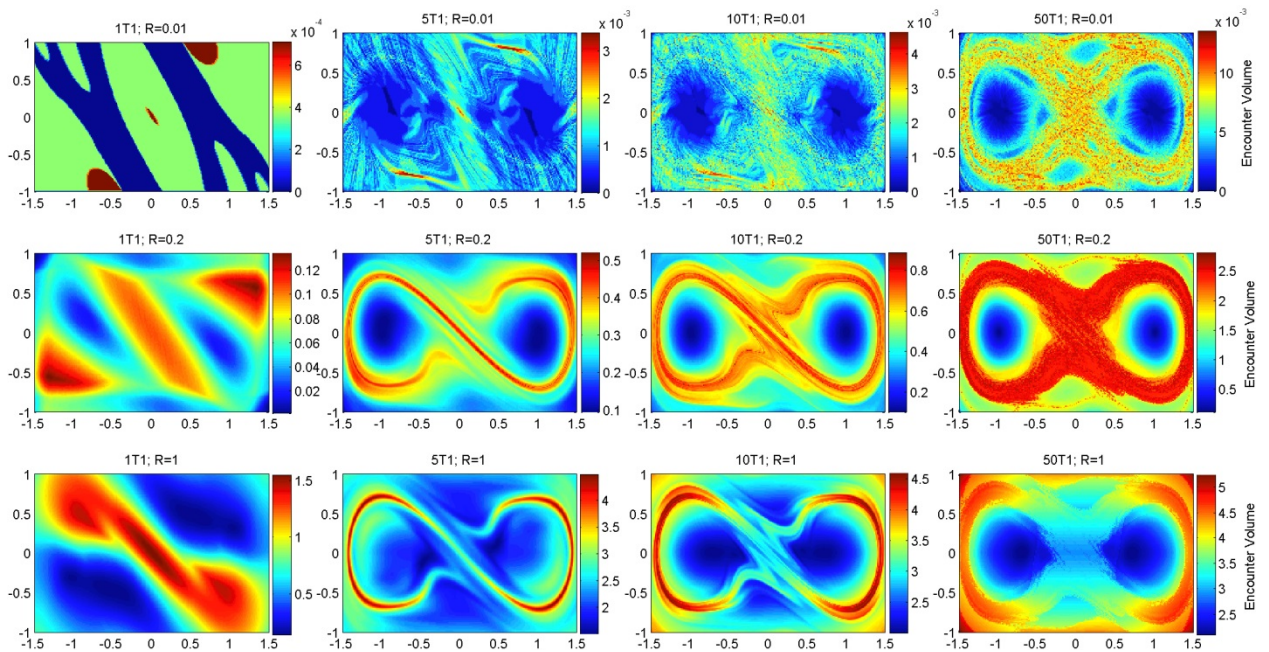

710  
 711  
 712  
 713  
 714  
 715

**Figure 2. Encounter volume for the Duffing Oscillator for various integration times, from  $T=0.1T_{\text{pert}}$  (on the left) to  $T=50T_{\text{pert}}$  (on the right), and for various encounter radii, from  $R=0.01$  (on the top) to  $R=1$  (on the bottom). Trajectories were released on a regular grid spanning the entire domain with grid spacing of 0.013 in both  $x$  and  $y$  directions.**



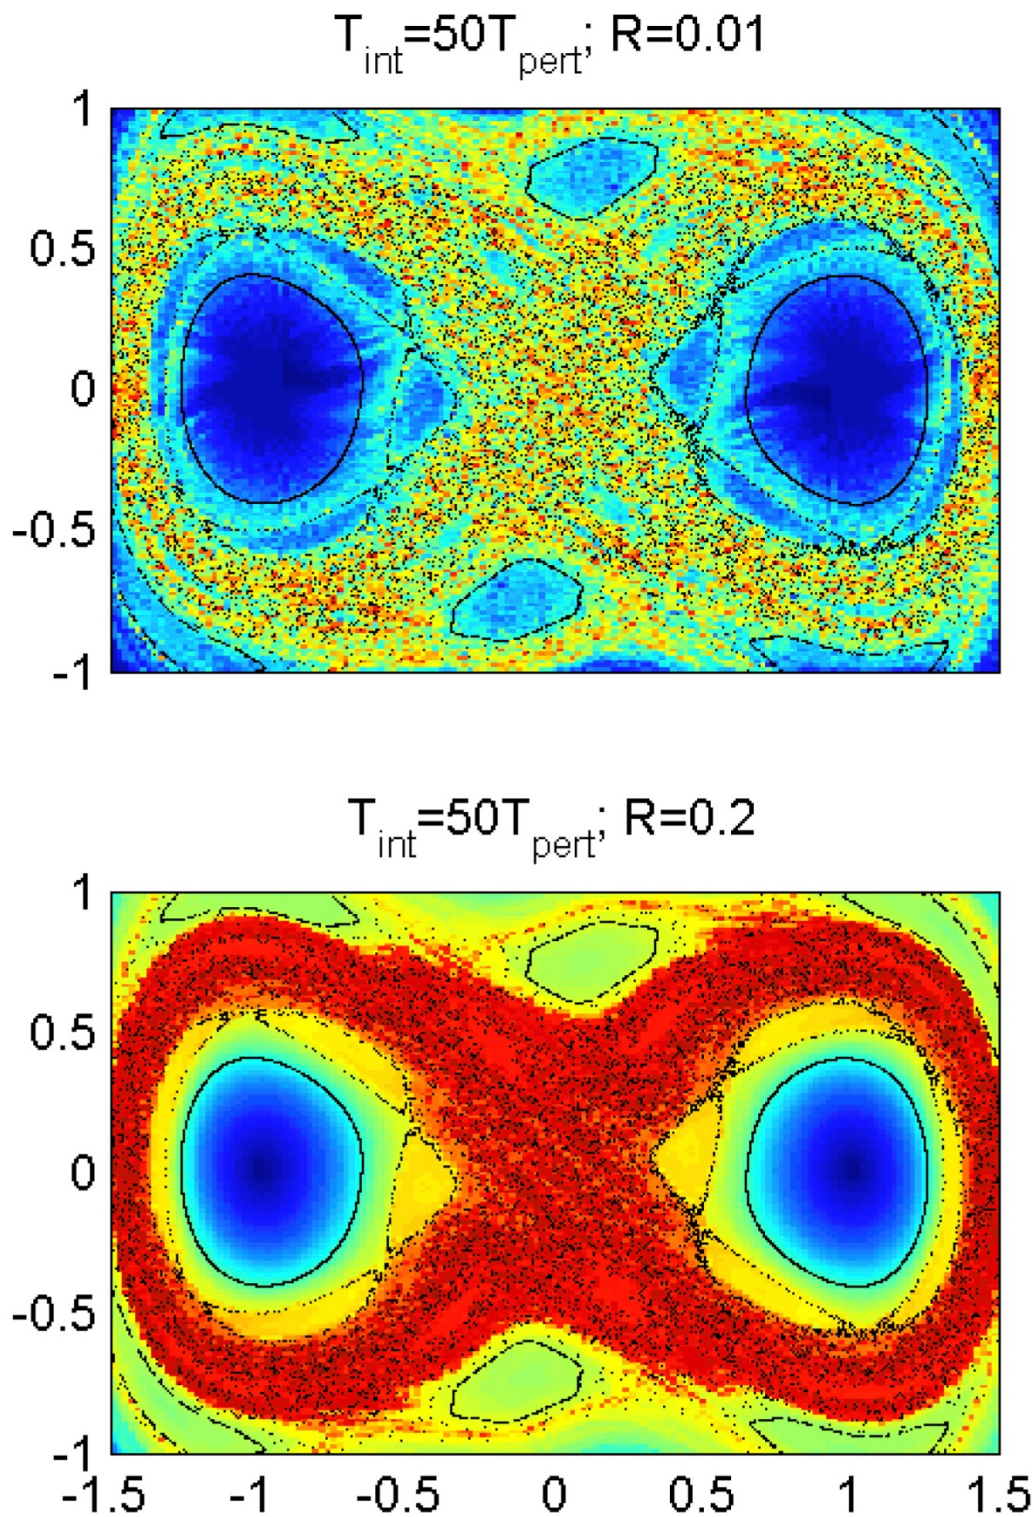

716

717 **Figure 3. Poincaré section (black dots; same as in the bottom panel of Fig. 1) superimposed**  
 718 **onto the encounter volume (color; same as top and middle right panels in Fig. 2). Only**  
 719 **select trajectories from the Poincaré section are shown.**

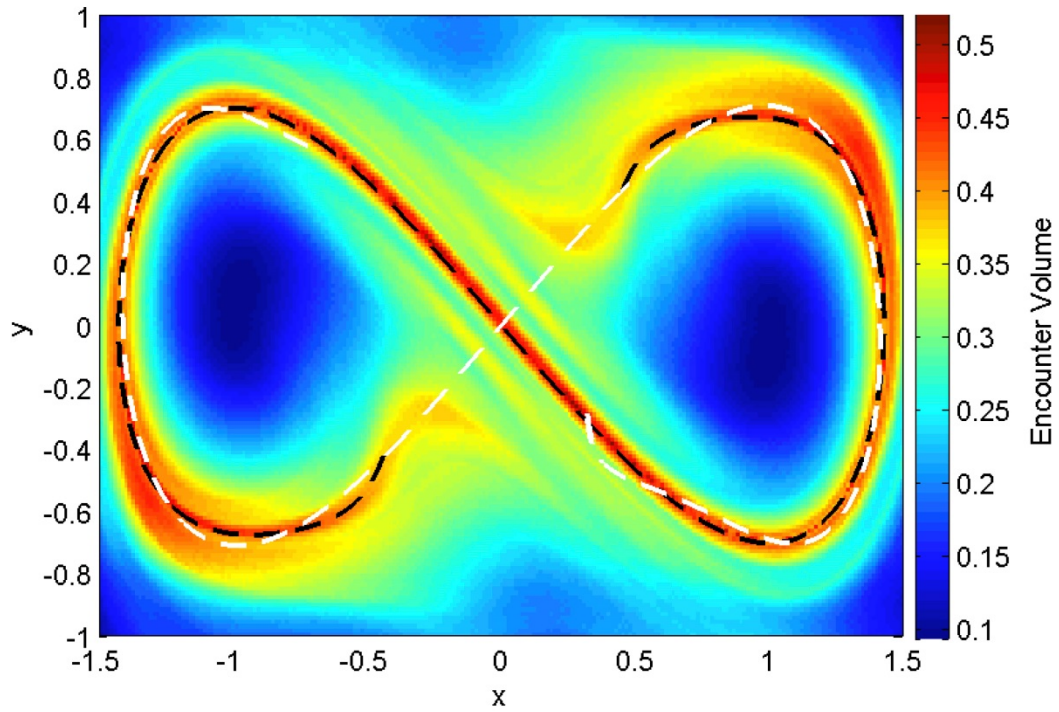

720  
721  
722  
723  
724  
725  
726  
727  
728  
729  
730  
731  
732  
733  
734  
735

**Figure 4. Encounter Volume (color; the same as 2<sup>nd</sup> row and 2<sup>nd</sup> column subplot of Fig. 2) and stable (black) and unstable (white) manifolds for the Duffing Oscillator flow computed using the direct method.**



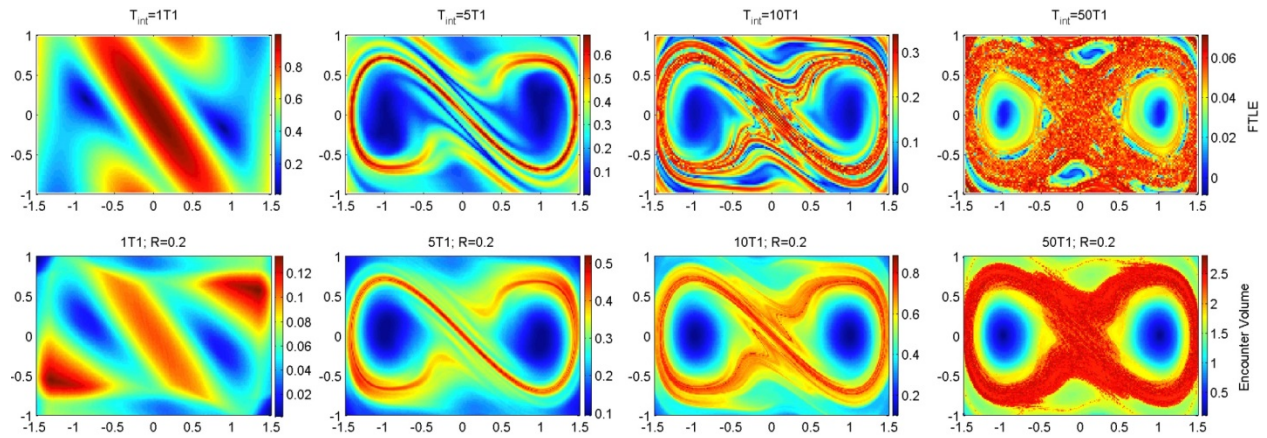

736  
 737 **Figure 5. Comparison between the FTLEs (top) and the encounter volume (bottom; same**  
 738 **as middle row of Fig. 2) for the Duffing Oscillator flow for various integration times, from**  
 739  **$T=0.1T_{\text{pert}}=0.13$  (on the left) to  $T=50T_{\text{pert}}=66.67$  (on the right). The same set of**  
 740 **trajectories, deployed on a dense initial grid with 0.02 grid spacing is used in all**  
 741 **simulations. In the bottom panels,  $R=0.2$ .**

742  
 743  
 744  
 745  
 746  
 747  
 748  
 749  
 750  
 751  
 752  
 753  
 754  
 755  
 756

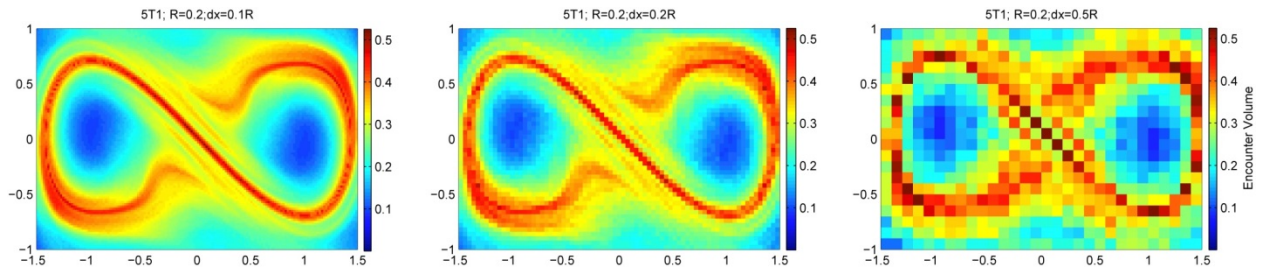

757  
 758 **Figure 6. Encounter volume,  $V$ , for the Duffing Oscillator flow for various grids of initial**  
 759 **positions, from dense grid spacing of 0.02 (left), to intermediate grid spacing of 0.04**  
 760 **(middle), to coarse grid spacing of 0.1 (right). Encounter radius,  $R=0.2$ , and integration**  
 761 **time,  $T=6.67$ , are the same in all 3 simulations.**

762

763

764

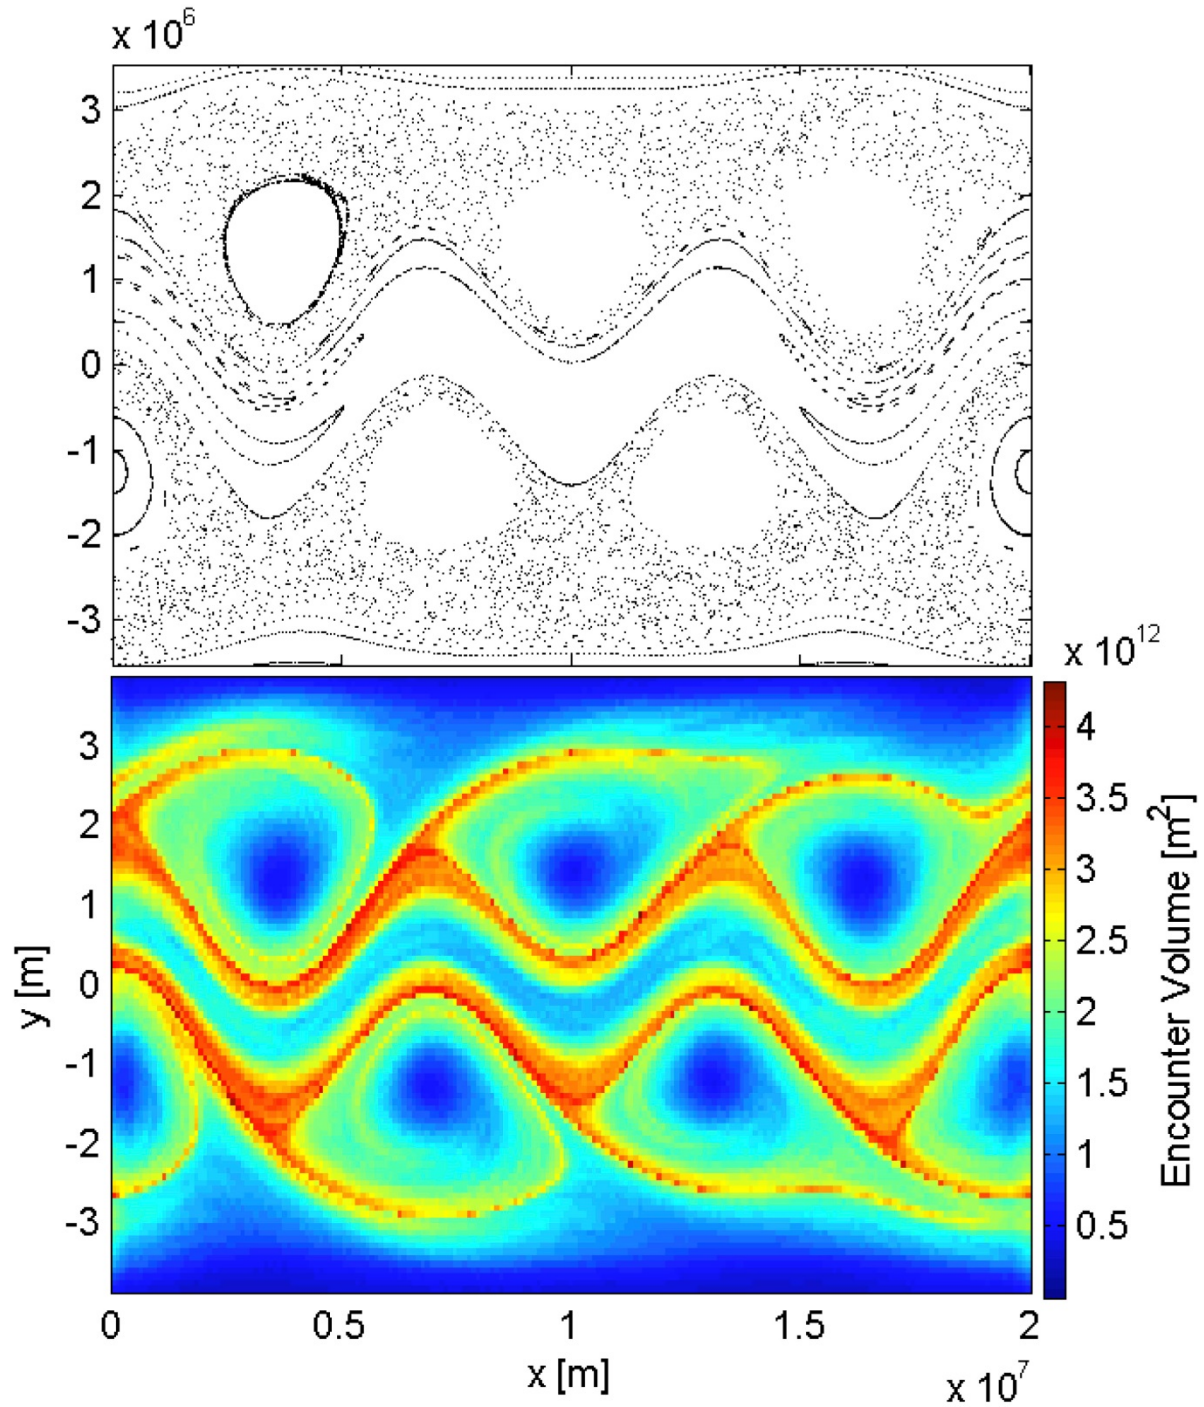

765

766 **Figure 7. Poincaré section (top) and encounter volume  $V$  (bottom) for the Bickley Jet flow.**  
 767 **For the  $V$  calculation, trajectories were released on a regular grid spanning the entire**  
 768 **domain with grid spacing of about  $10^5$  in both  $x$  and  $y$  directions.**

769

770

771

772

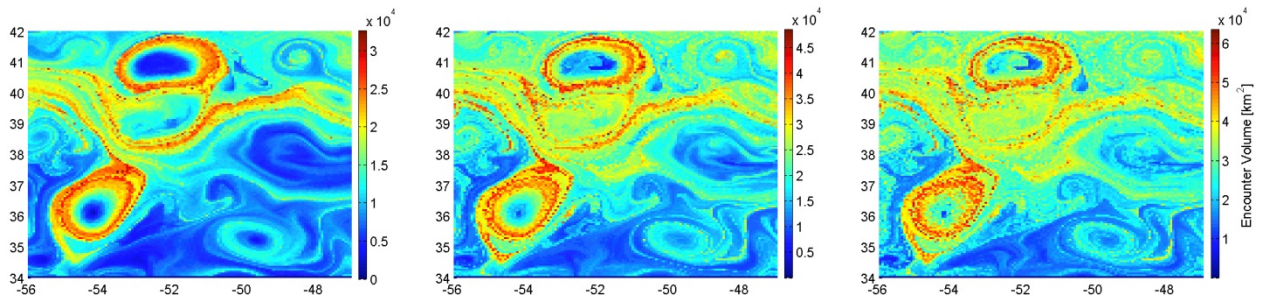

773 **Figure 8. Encounter volume for the AVISO velocities in the Gulf Stream Extension region**  
774 **for trajectories released on 7/11/1997 and integrated over 30 days (left), 60 days (middle)**  
775 **and 90 days (right). Trajectories were released on a regular grid spanning the domain from**  
776 **65W to 35W and from 30N to 50N with grid spacing of about 0.06 deg in both longitude**  
777 **and latitude. Additional simulations were performed to insure that the release domain was**  
778 **sufficiently large, and that further increase of the release domain does not lead to changes**  
779 **in the encounter volume for trajectories starting in the subdomain shown.**

780

781

782

783

784

785

786

787

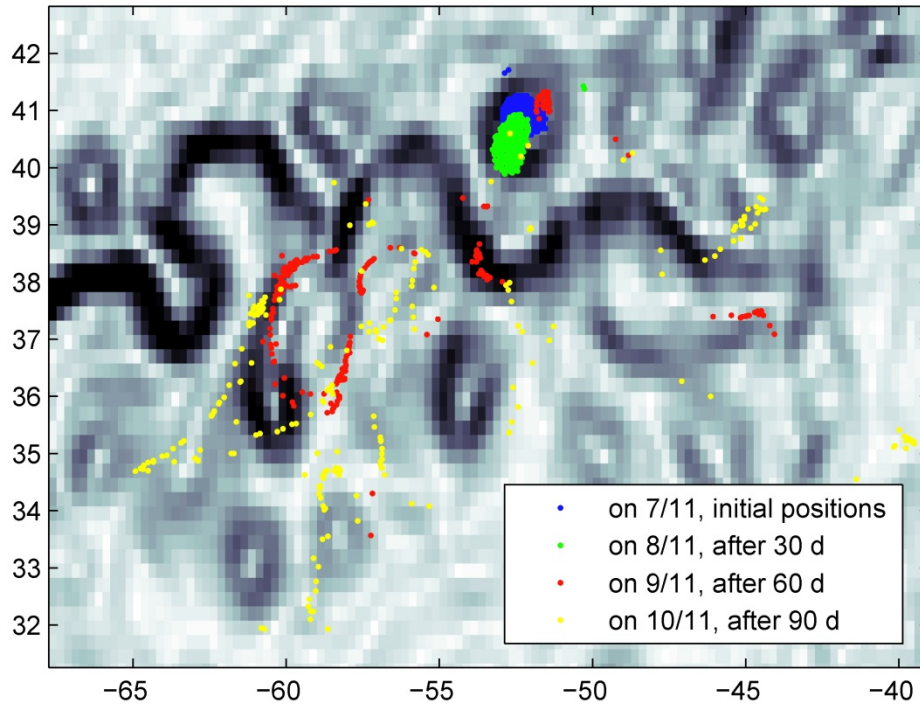

788

789 **Figure 9. Positions of trajectories that were initially located within the eddy core on**  
 790 **7/11/1997 (blue patch) after 30 days (green), 60 days (red) and 90 days (yellow) of**  
 791 **integration. Background shows the flow kinetic energy snapshot on 7/11/1997.**

792

793

794

795

796

797

798

799

800

801

802

803



804

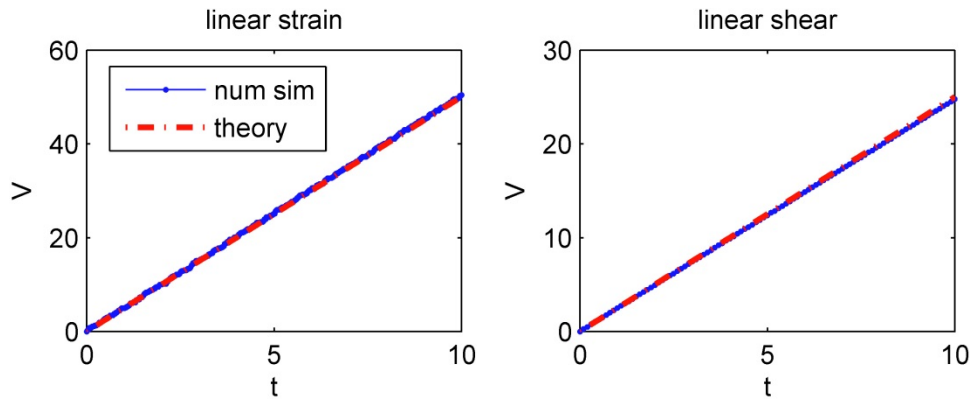

805

806

807

808

809

810

**Figure 10. Comparison between numerically computed encounter volume (blue) and analytical predictions (eqs. (8) and (9)) (red) for the linear strain (left) and linear shear flows (right). For the linear shear flow  $\alpha=0.1$ ,  $R=5$ ,  $dx=dy=R/25$ ; for the linear strain flow  $\gamma=0.1$ ,  $R=5$ ;  $dx=dy=R/25$ . Other parameter choices show good agreement as well.**

811

812

813

814

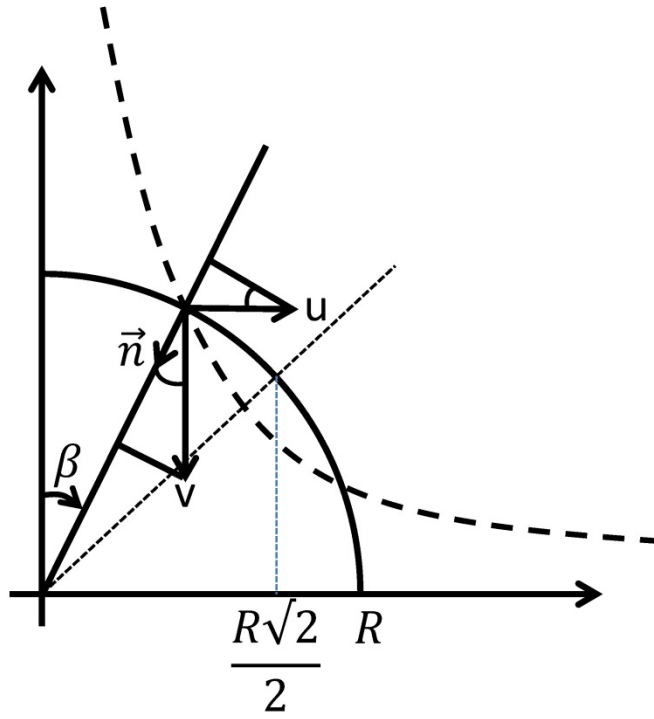

815

816

**Figure 11. Schematic diagram for estimating encounter number for a linear saddle.**

817

818

819

820

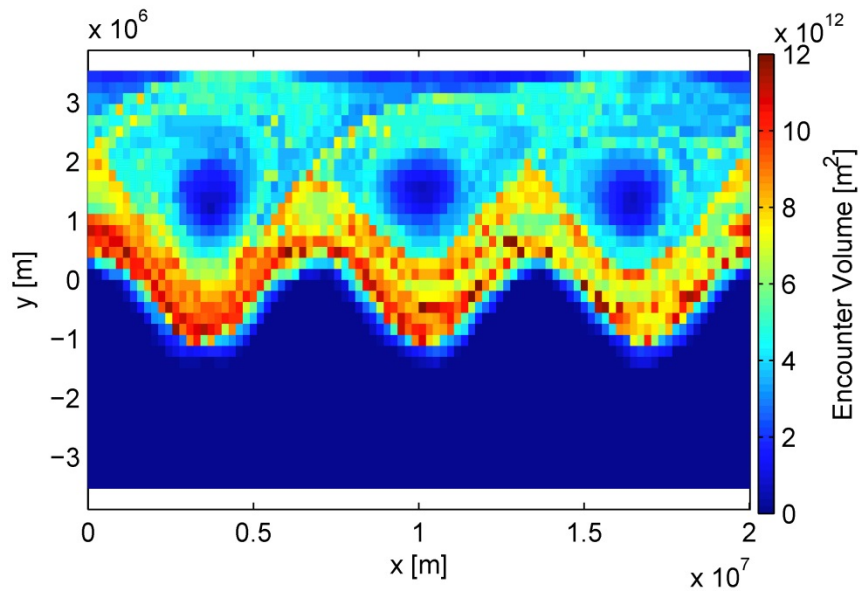

821

822 **Figure 12.  $u^*$ -based encounter volume,  $V^*$ , for a tracer with an initial distribution south**  
823 **the jet and constant meridional gradient north the jet.**

824
